# Supplementary material for: SUMC reveals conserved and context-specific tumor microenvironment architectures across heterogeneous spatial datasets
Source: Research Square preprint supplement (doi:10.21203/rs.3.rs-8197716/v1), 2026-01-22
Supplement: Supplementary file 1 [file 642cf80fba3d95a8f990a9d0.docx]

**SUMC reveals conserved and context-specific tumor microenvironment architectures across heterogeneous spatial datasets**

**Supplemental Tables**

Table S1. Information about the datasets utilized in the study.

Table S2. Detailed information about each individual samples in different datasets.

**Supplemental Figures**


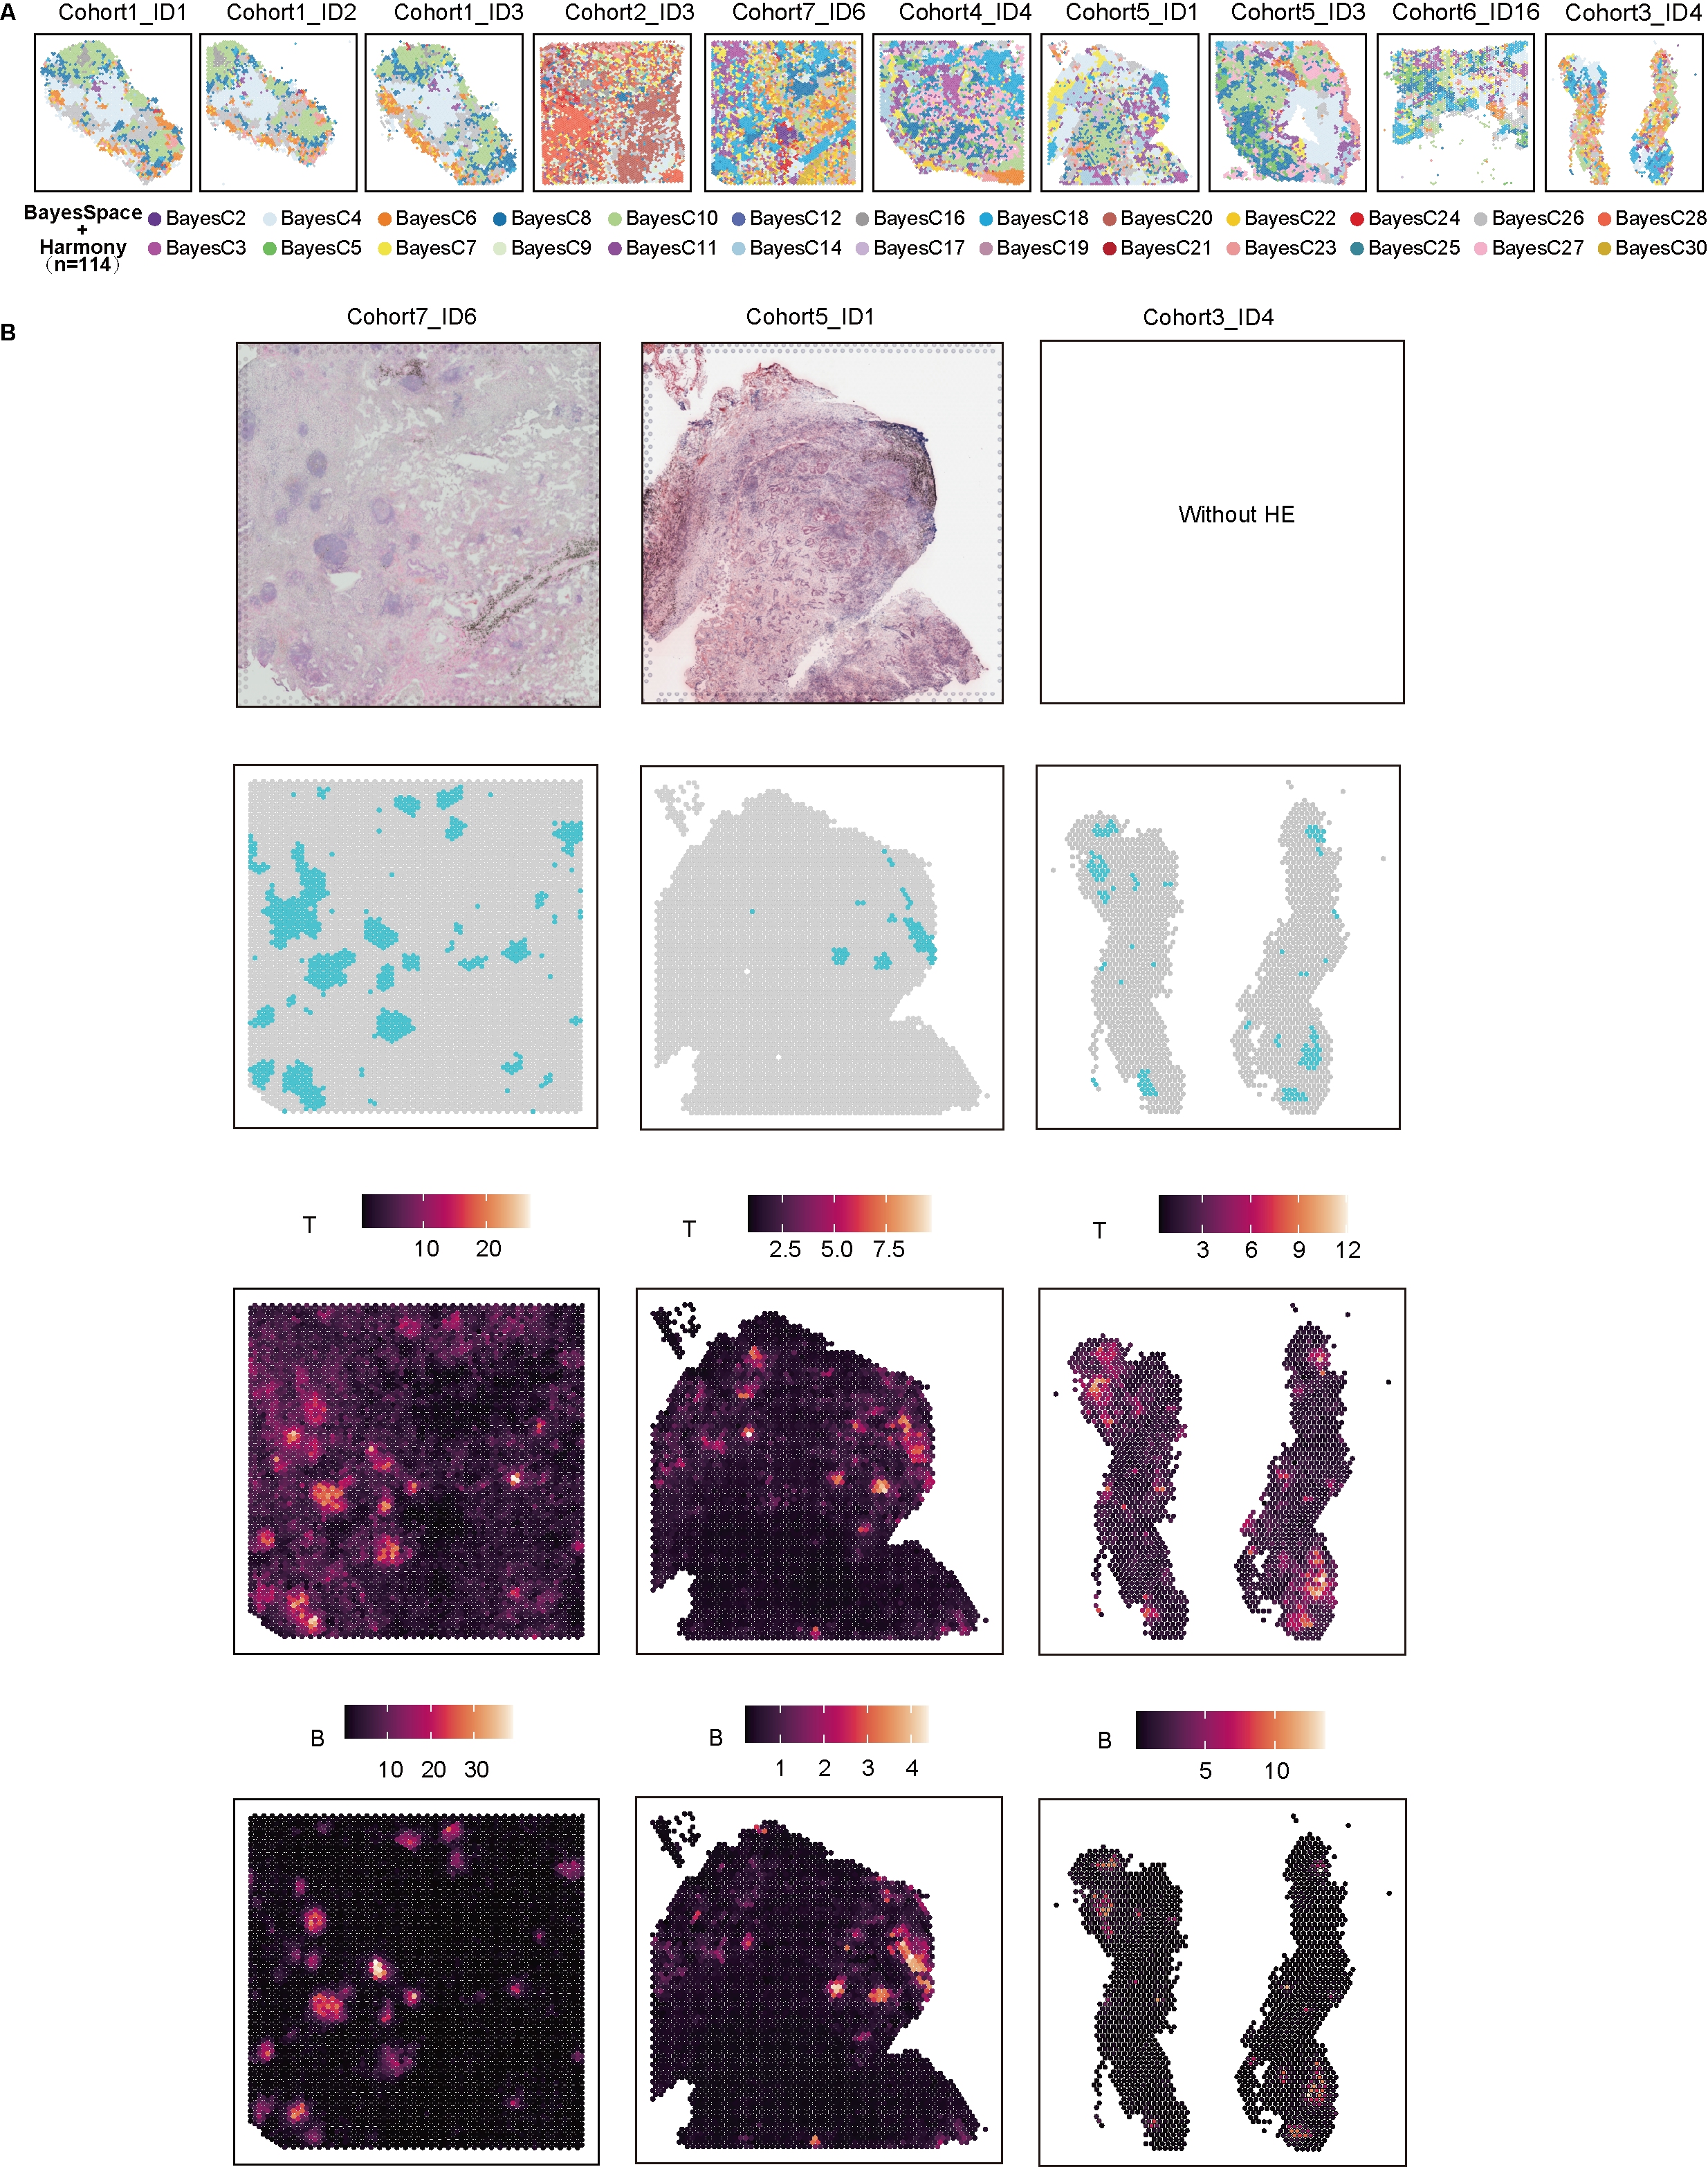


**Figure S1. Evaluation of the performance of SUMC in integration analysis of multi-batch ST data.**

1. Spatial distribution of the clustering results across the exploration dataset (n=114) using BayesSpace + Harmony strategy, with the 10 representative ST samples shown.
2. H&E images, spatial distribution of the cluster SUMC6, along with the T cell and B cell scores in three representative ST samples. T cell and B cell scores were derived using cell2location.


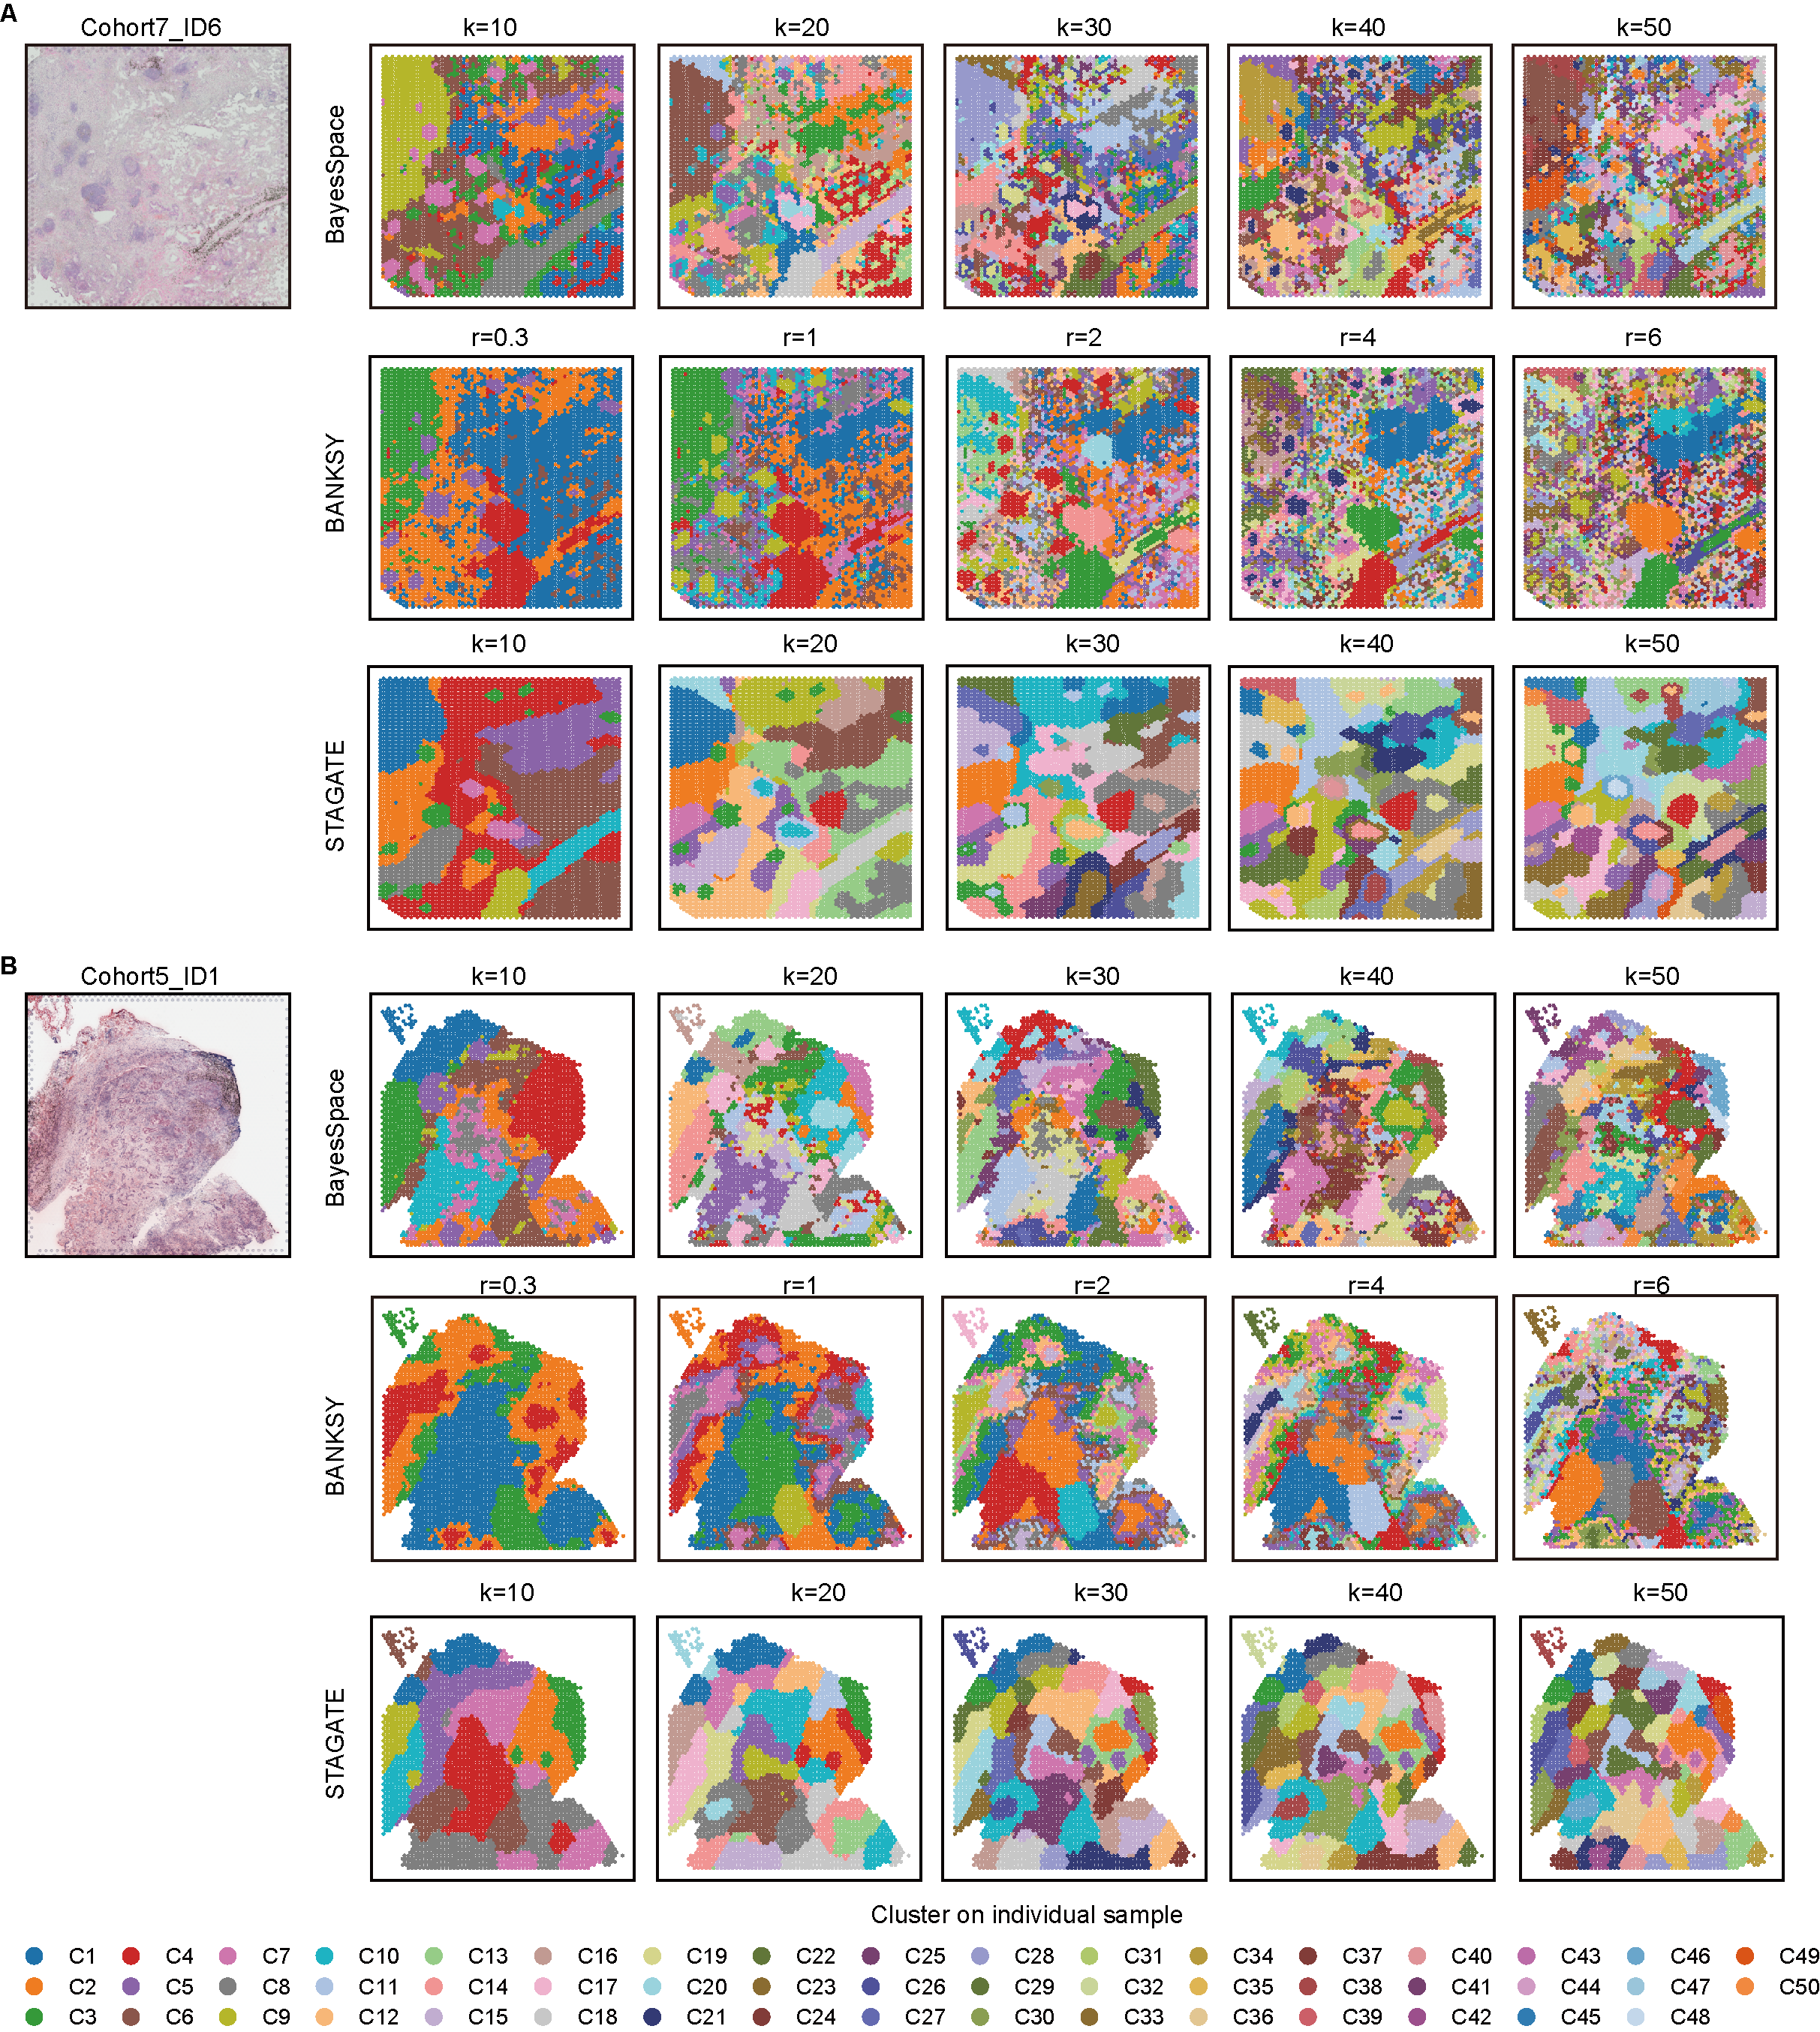


**Figure S2. Clustering analysis on individual samples.**

(A-B) Spatial distribution of the clustering results using different algorithms with different cluster numbers on ST samples Cohort7_ID6 (A) and Cohort5_ID1 (B). The clustering was performed on each individual sample separately.


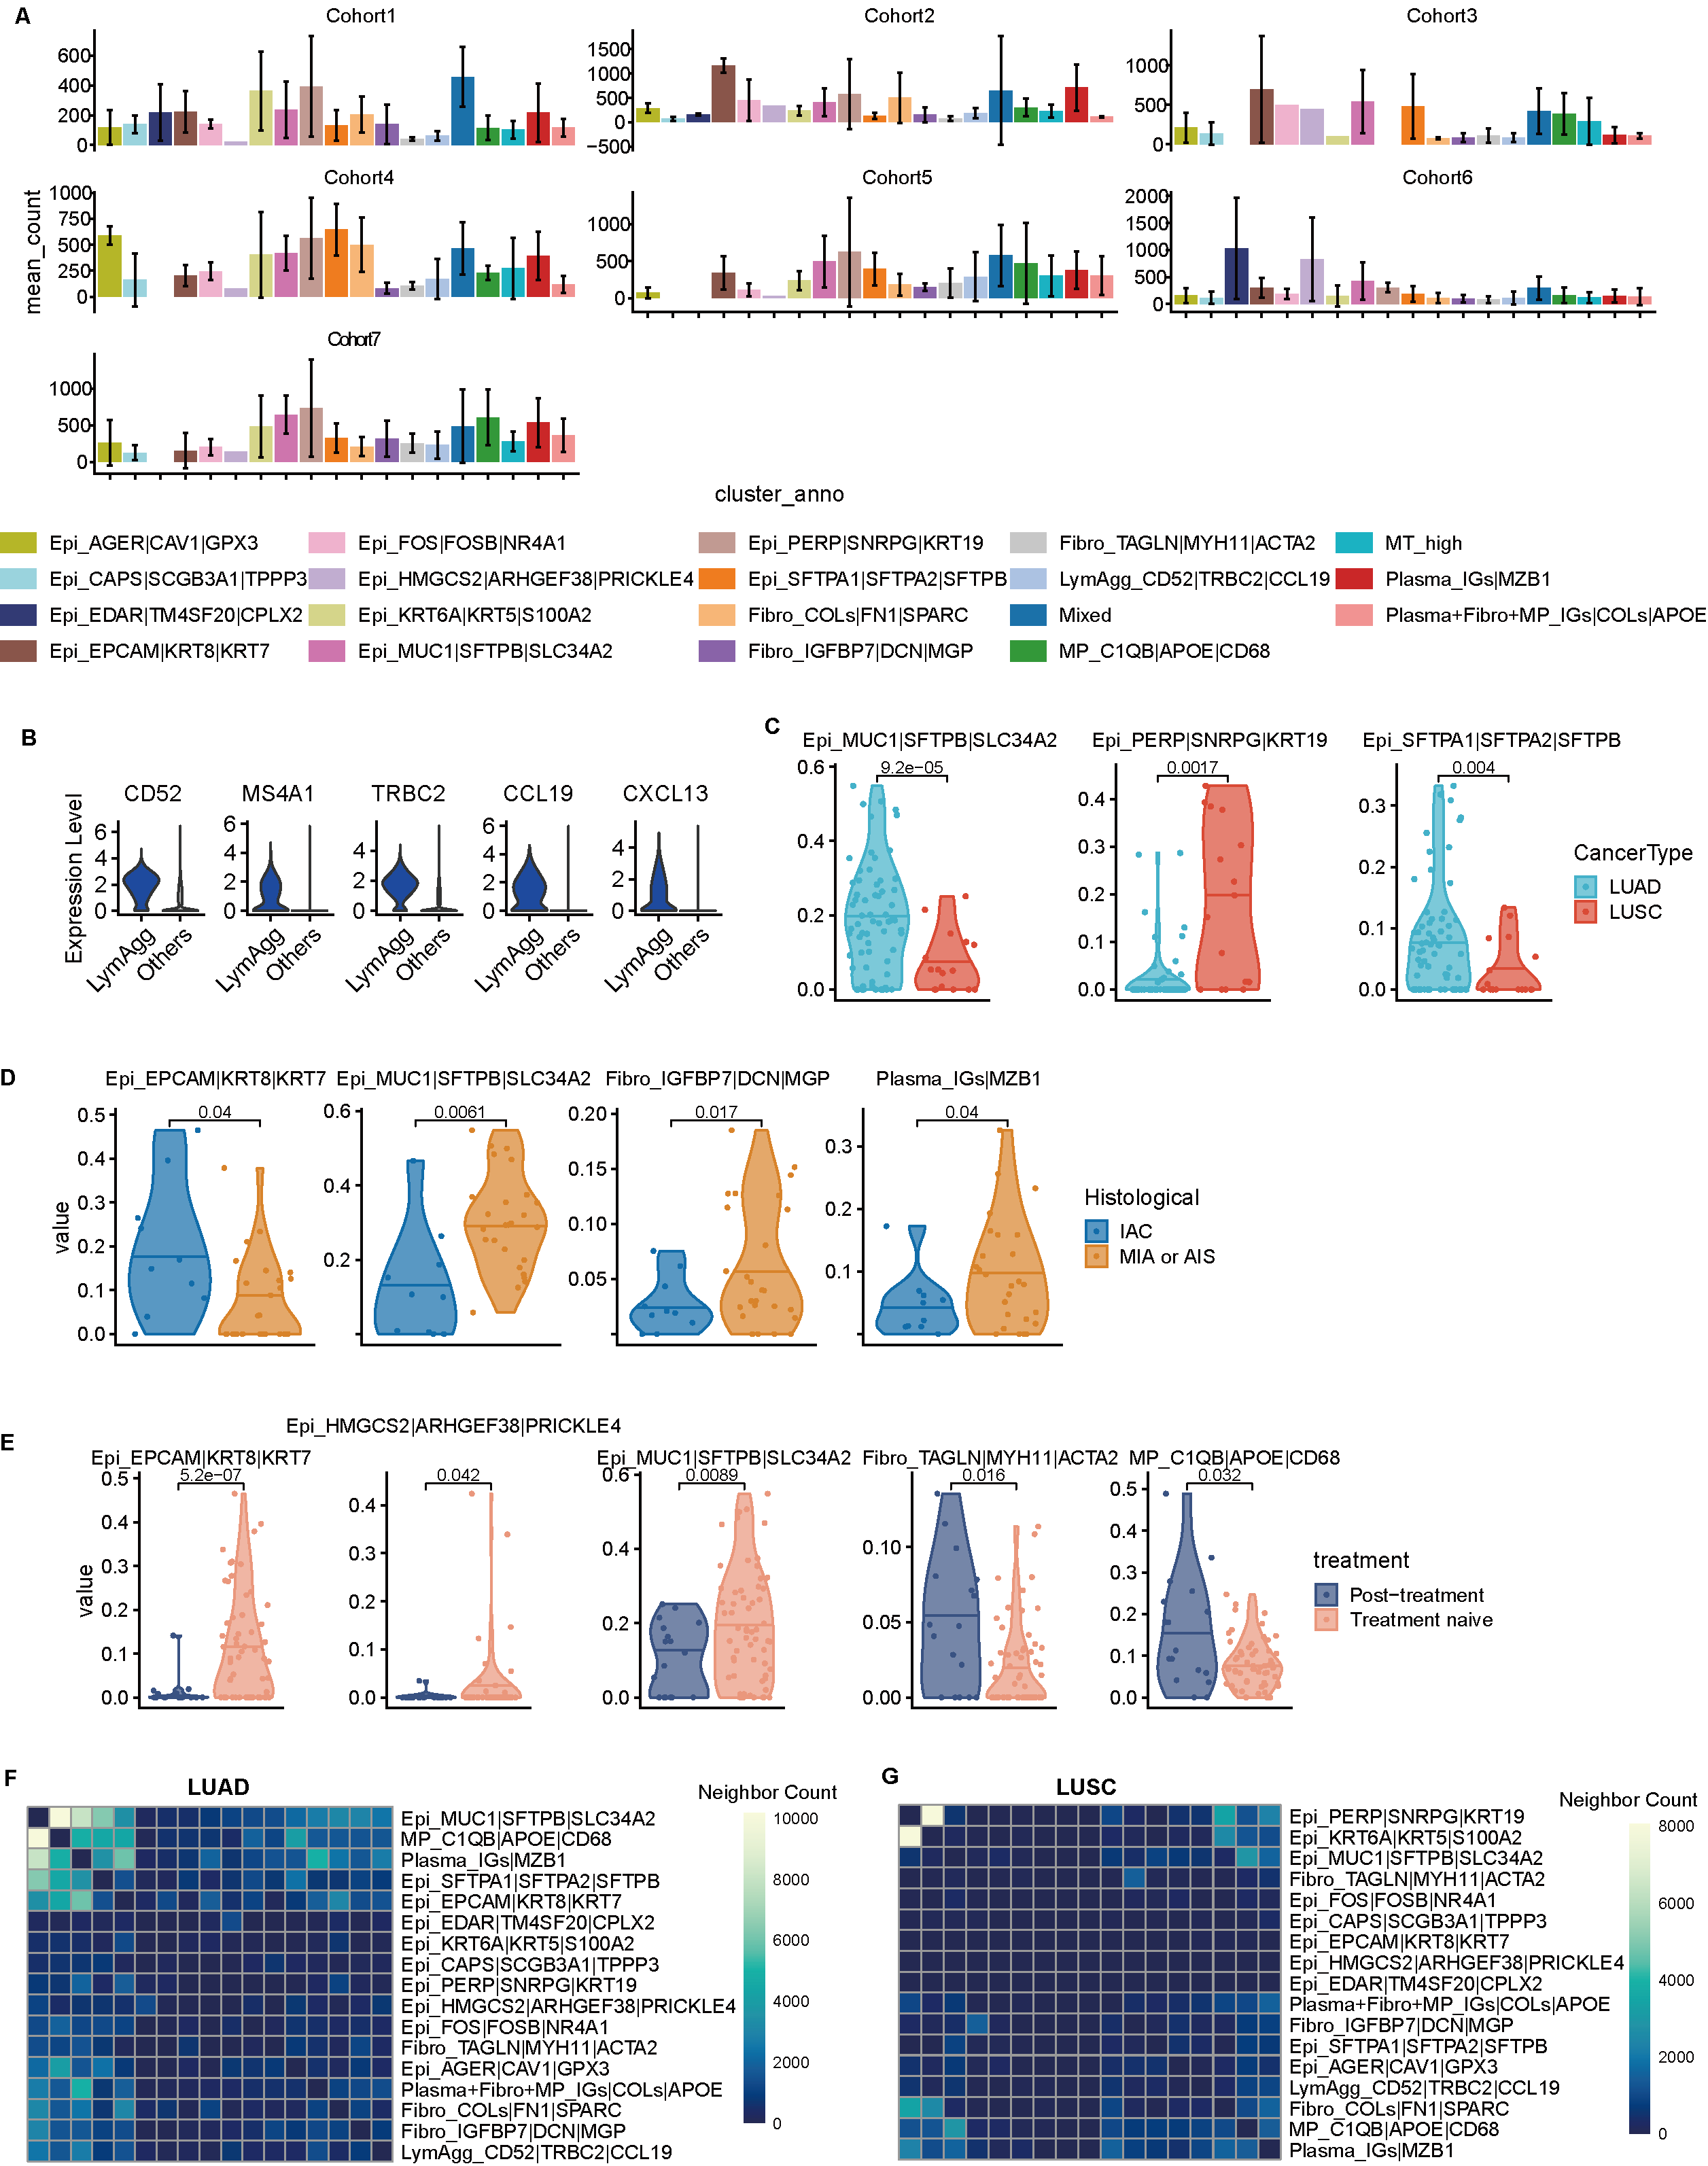


**Figure S3. SUMC based spatial patterns of NSCLC reveal distinct spatial niches and their clinical relevance across multiple cohorts.**

1. Bar plot showing the number of spots annotated as different types of major spatial patterns. Scale bar: mean±SD.
2. Violin plot showing the expressions of several TLS relevant marker genes in LymAgg and other spots.

(C-E) Violin plot showing the distributions of Epi spatial patterns associated with cancer types (C), histological classifications (D) and treatments (E). T-test, two-sided, un-paired. N: number of spots.

(F) Heatmap showing the total neighborhood enrichment scores between different spatial patterns in LUAD and LUSC samples respectively. The matrices are symmetrical, with the same column and row names.


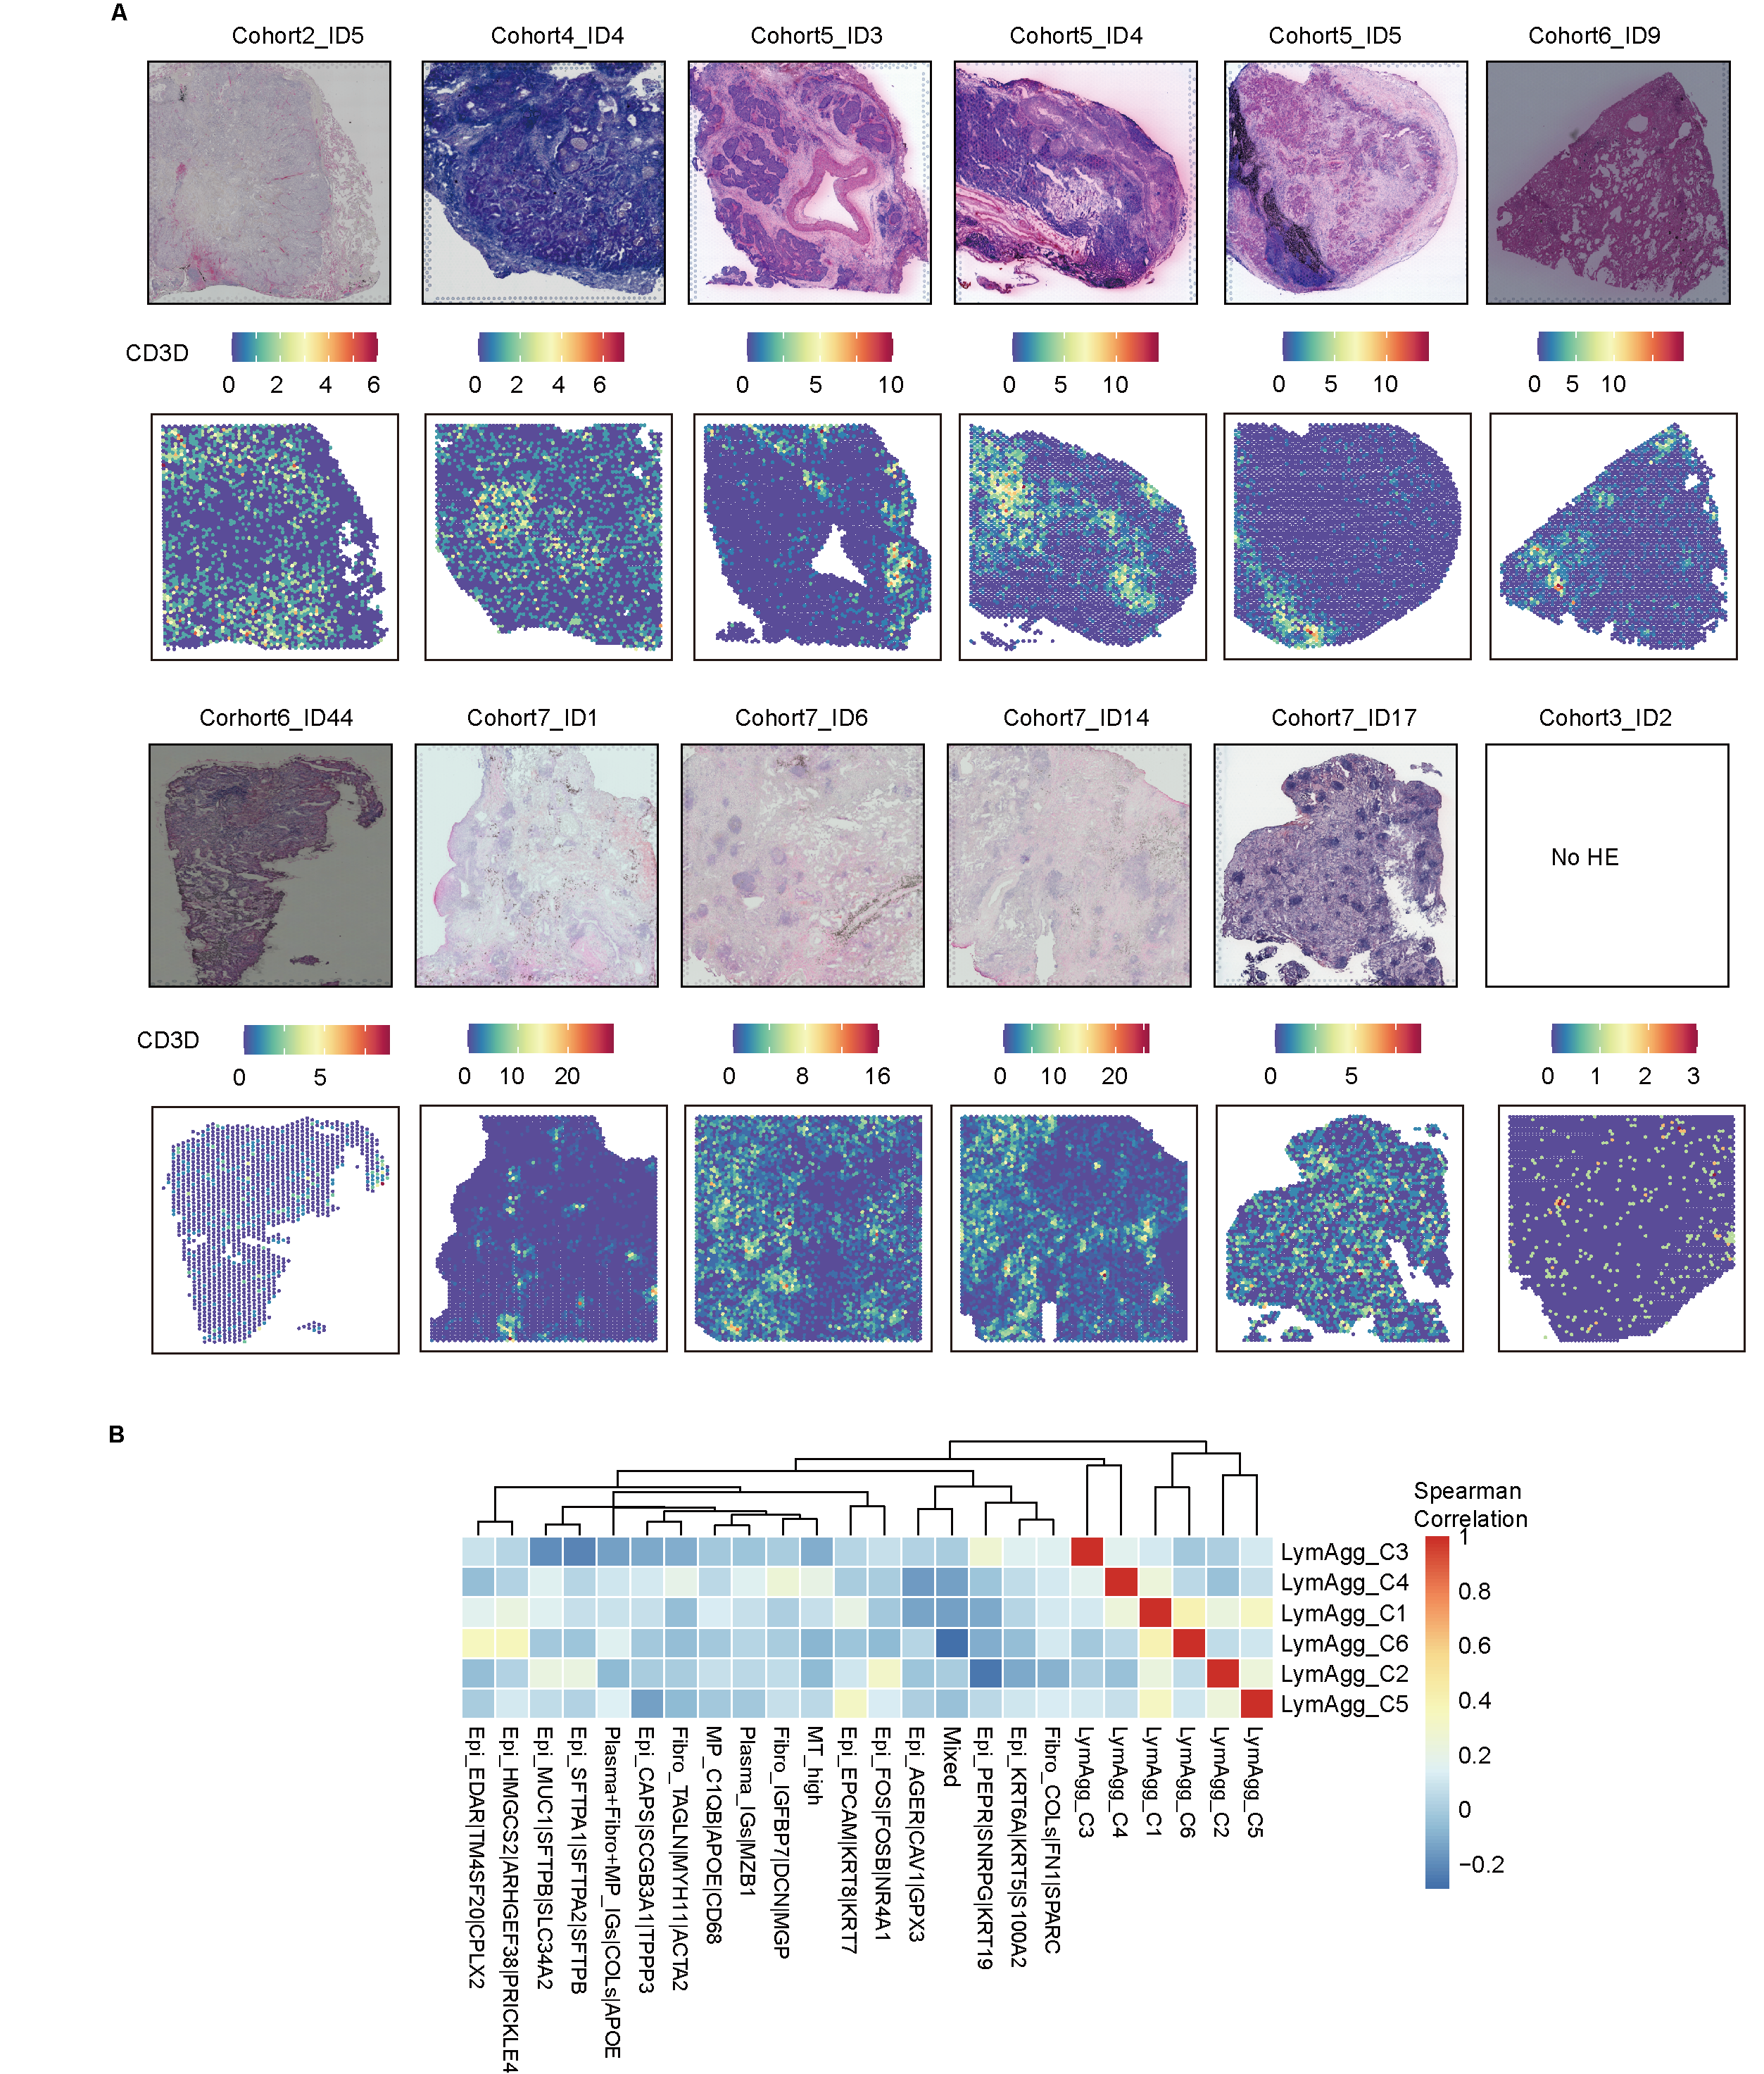


**Figure S4. SUMC derived LymAgg sub-patterns.**

1. H&E images and corresponding spatial distribution of *CD3D* expressions in representative samples.
2. Heatmap showing the Spearman correlation coefficients between LymAgg sub-patterns and all spatial patterns.


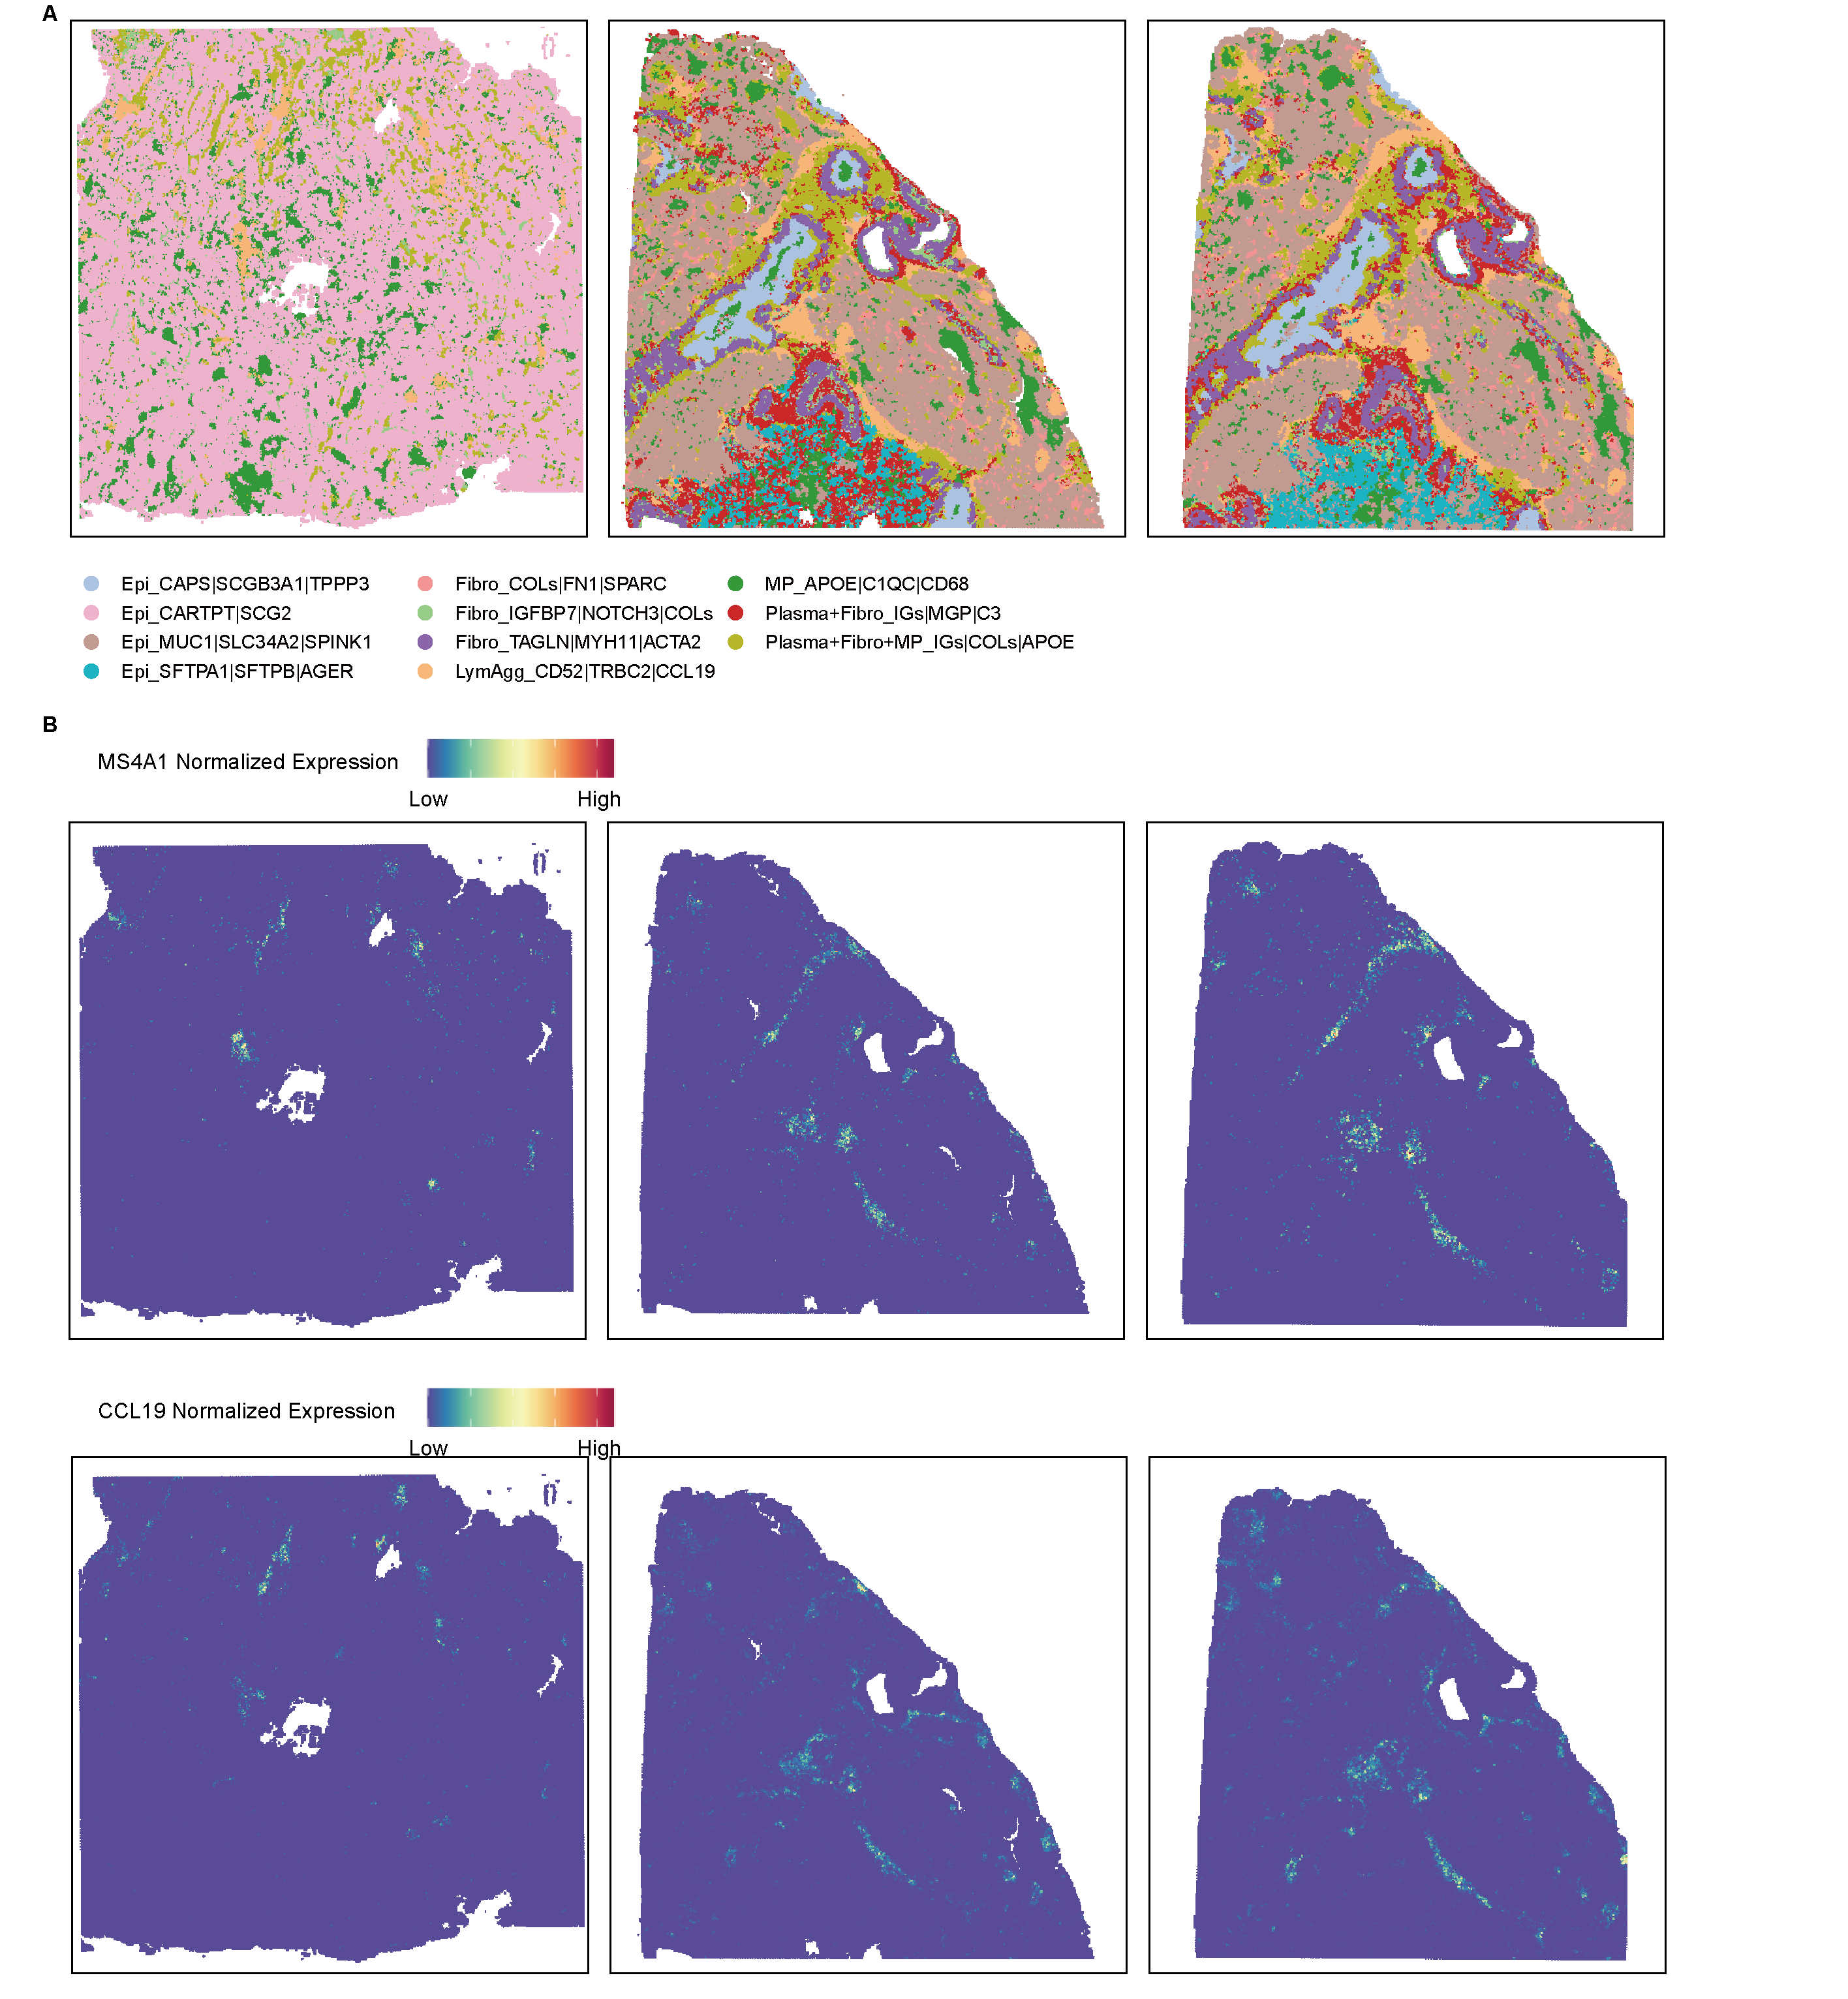


**Figure S5. SUMC identifies consistent spatial patterns in the lung-based validation dataset.**

1. Enlarged images about the clustering results on three Visium HD based ST samples.
2. Spatial distribution of MS4A1 and CCL19 expressions in the three Visium HD based ST samples.


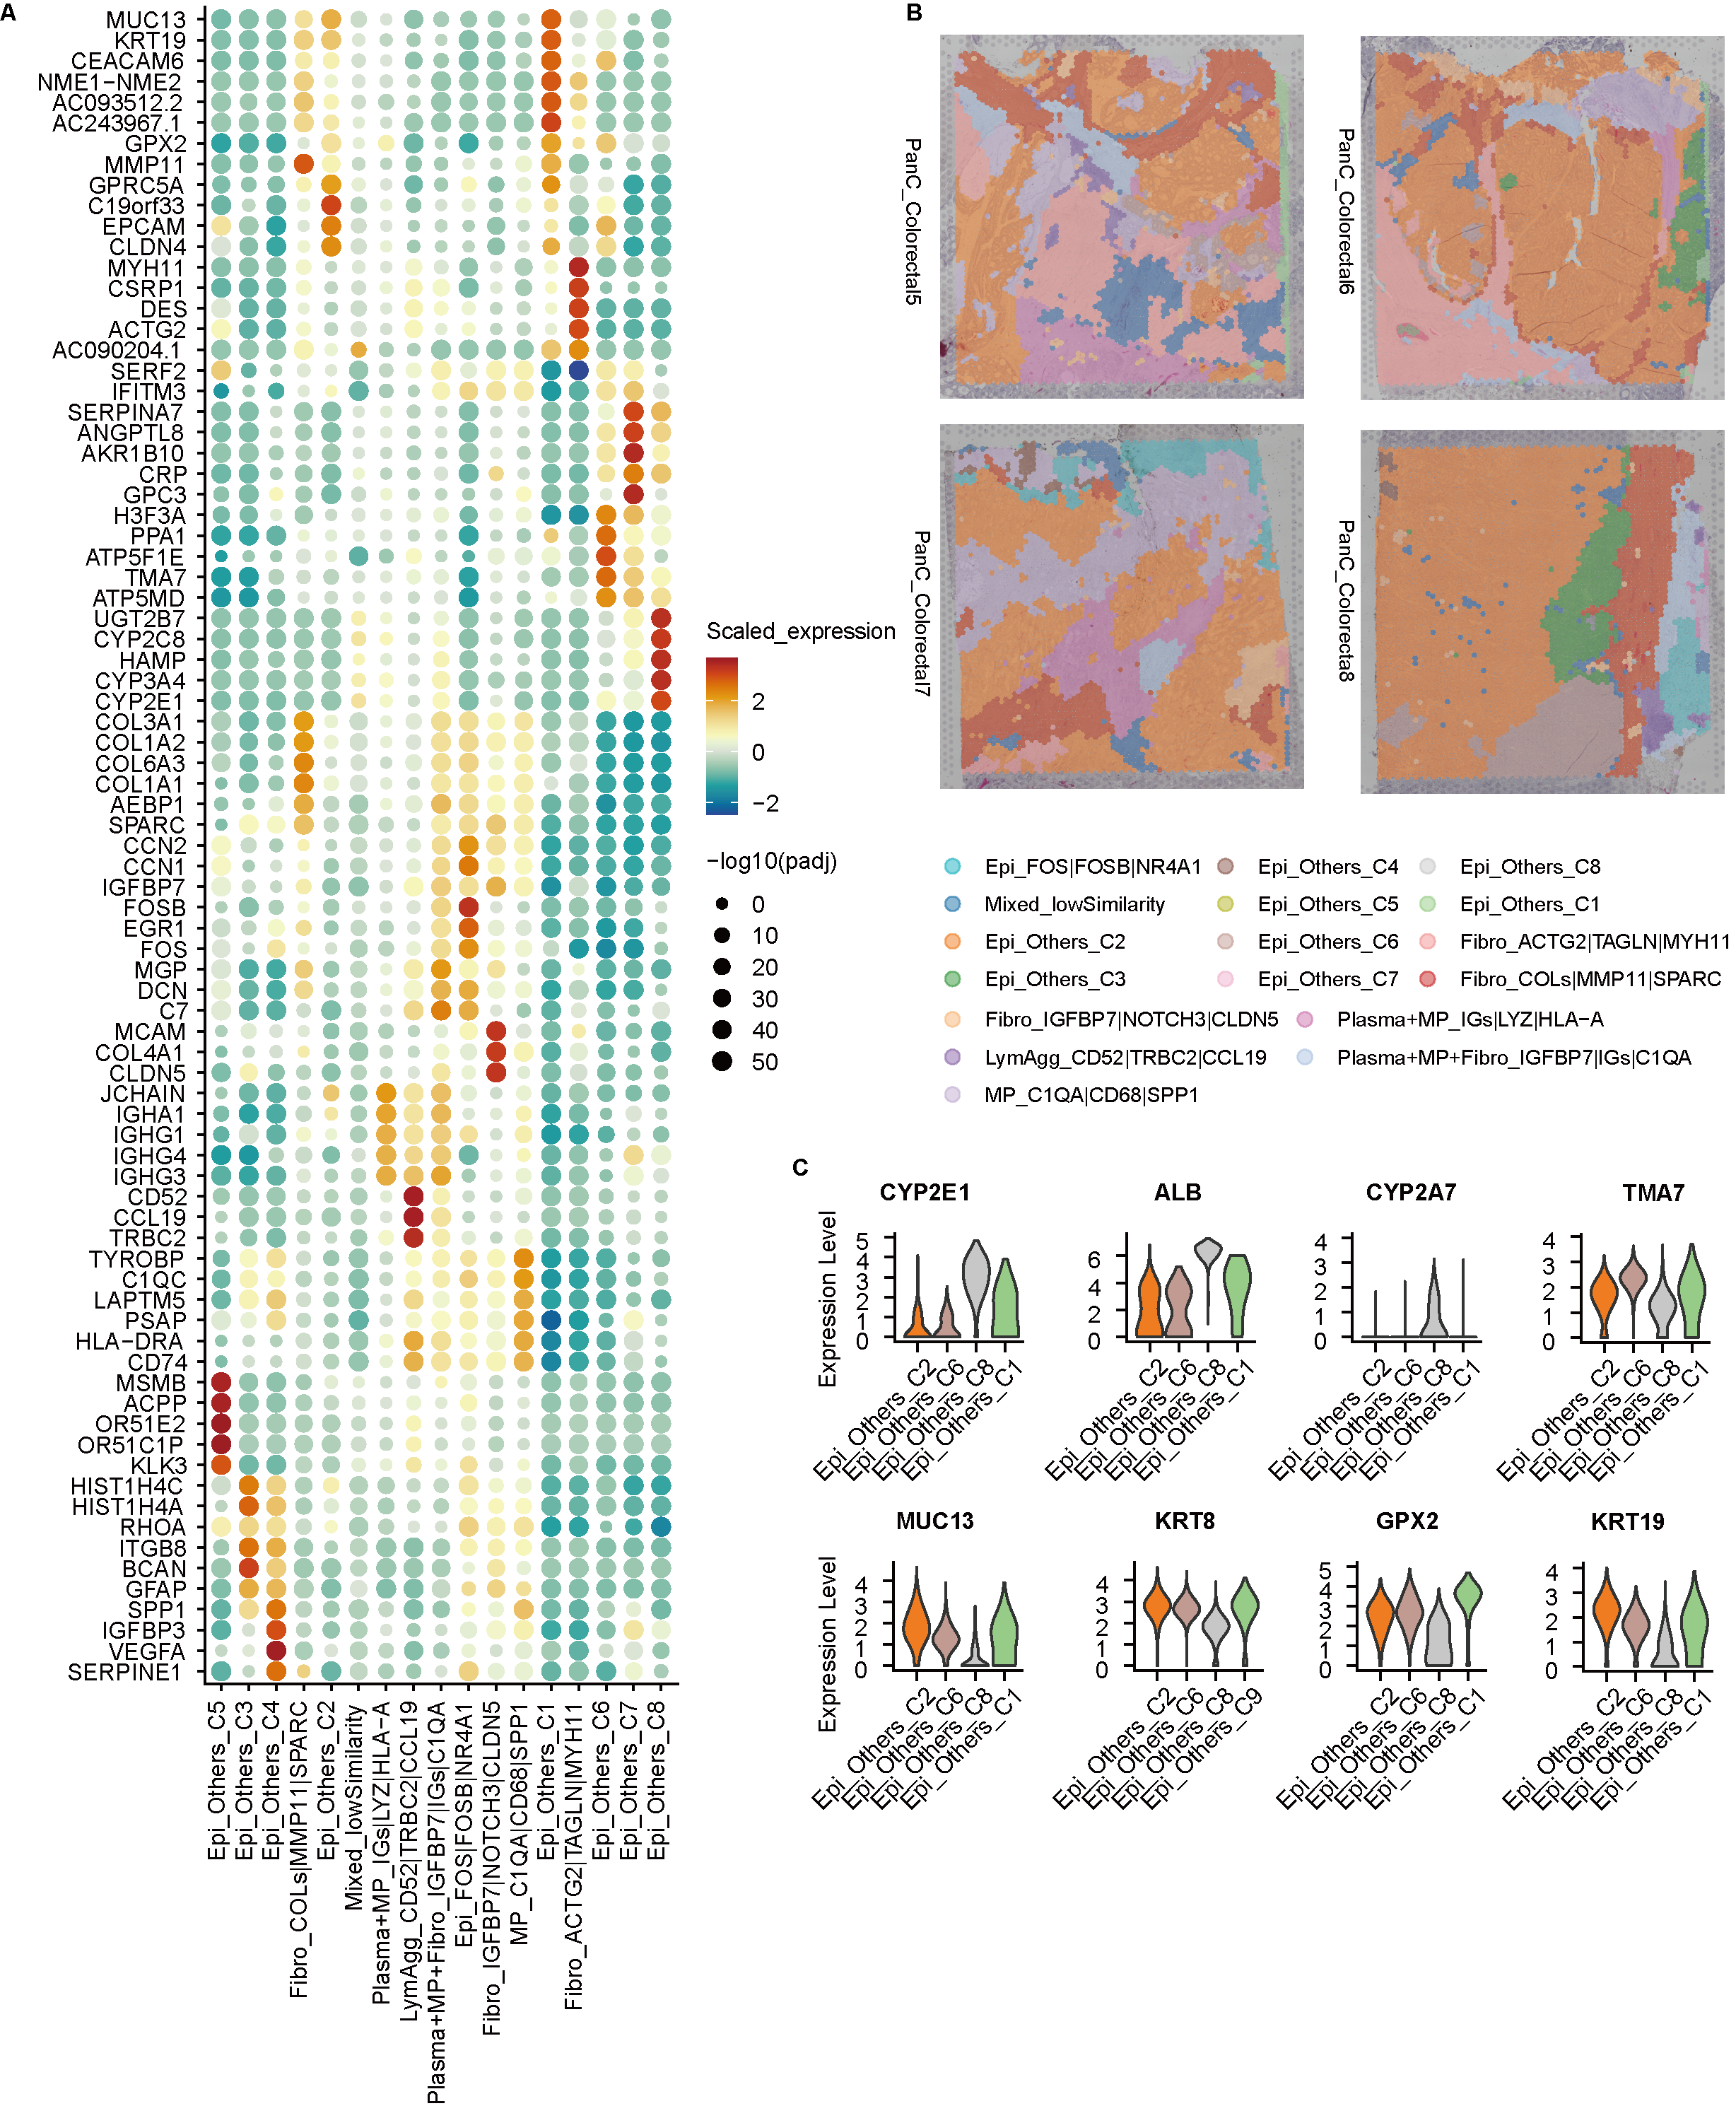


**Figure S6. SUMC identified consistent and specific spatial patterns across pan-cancer cohorts.**

1. Dot plot showing the representative marker genes (padj < 0.01) of different spatial patterns. The names of spatial patterns are defined as the dominant cell type and followed by representative specific marker genes. Padj: likelihood ratio test, adjusted by Benjamini Hochberg method.
2. Spatial distribution of the SUMC-derived spatial patterns in 4 representative colorectal cancer ST samples.
3. Violin plot showing the differentially genes of Epi_others_C2, Epi_others_C6 and Epi_others_C8.
